# Supplementary material
Source: PubMed Central journal article supplement (PMC8081346)
Supplement: NIHMS1677779-supplement-Source_Data_Extended_Data_Fig_1_unmodified_gels.pdf [file NIHMS1677779-supplement-Source_Data_Extended_Data_Fig_1_unmodified_gels.pdf]

**Extended Data Figure 1a (PTCL patient sample RT-PCR)**

FYN-TRAF3IP2, long exposure

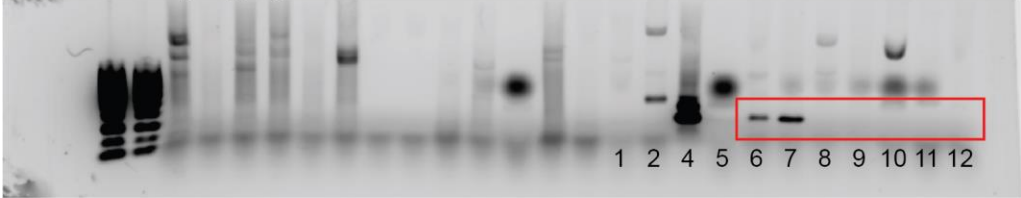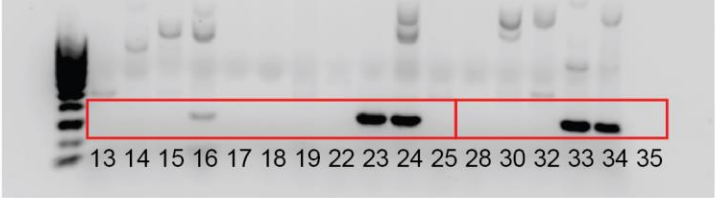

FYN-TRAF3IP2, short exposure

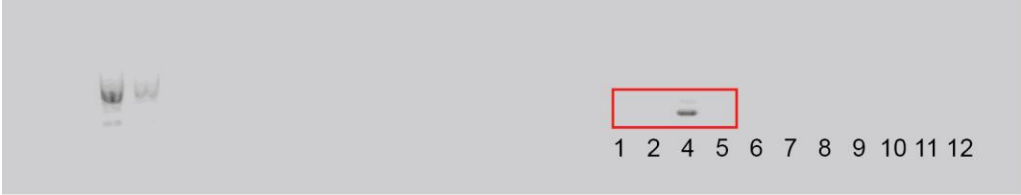

Actin

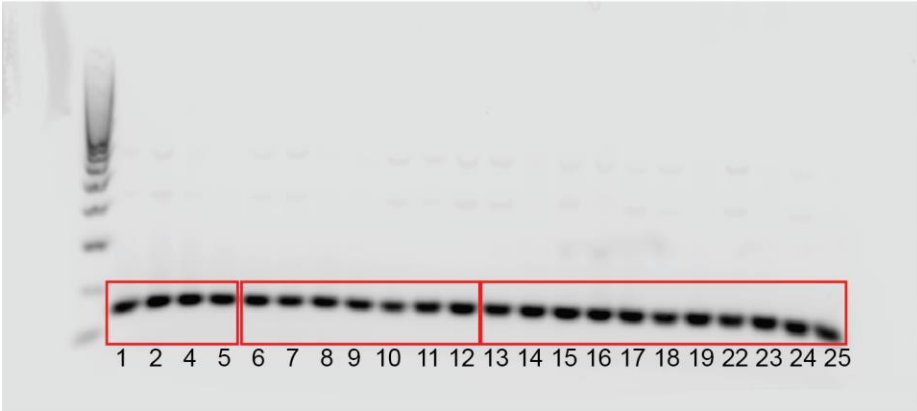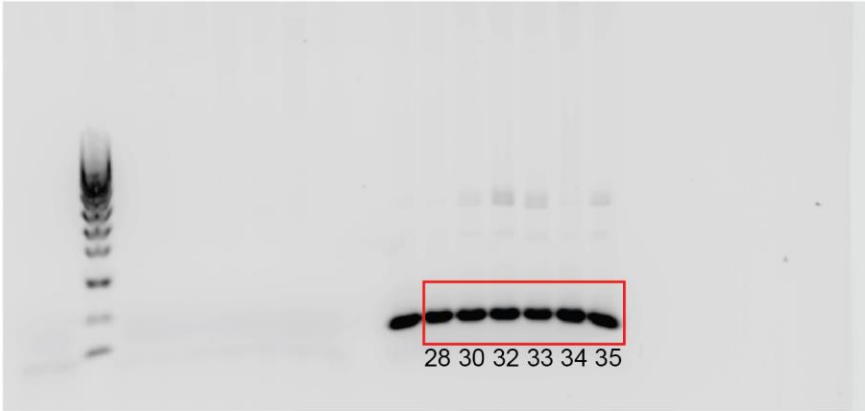

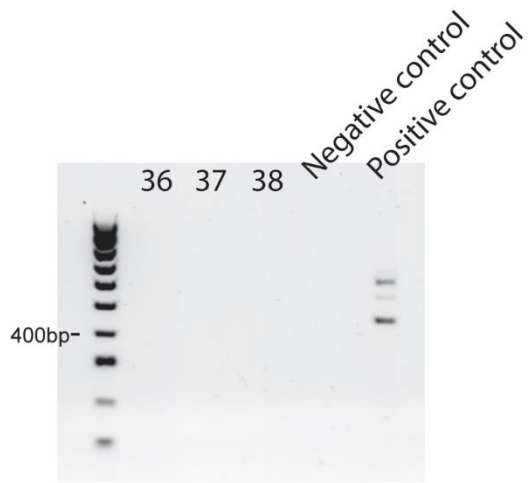

FYN-TRAF3IP2

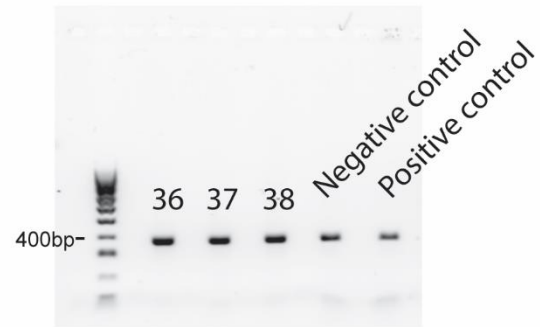

Actin
