# Supplementary material
Source: PubMed Central journal article supplement (PMC8081346)

Extended Data Figure 3c (CARD11 KO Jurkat reconstitution)

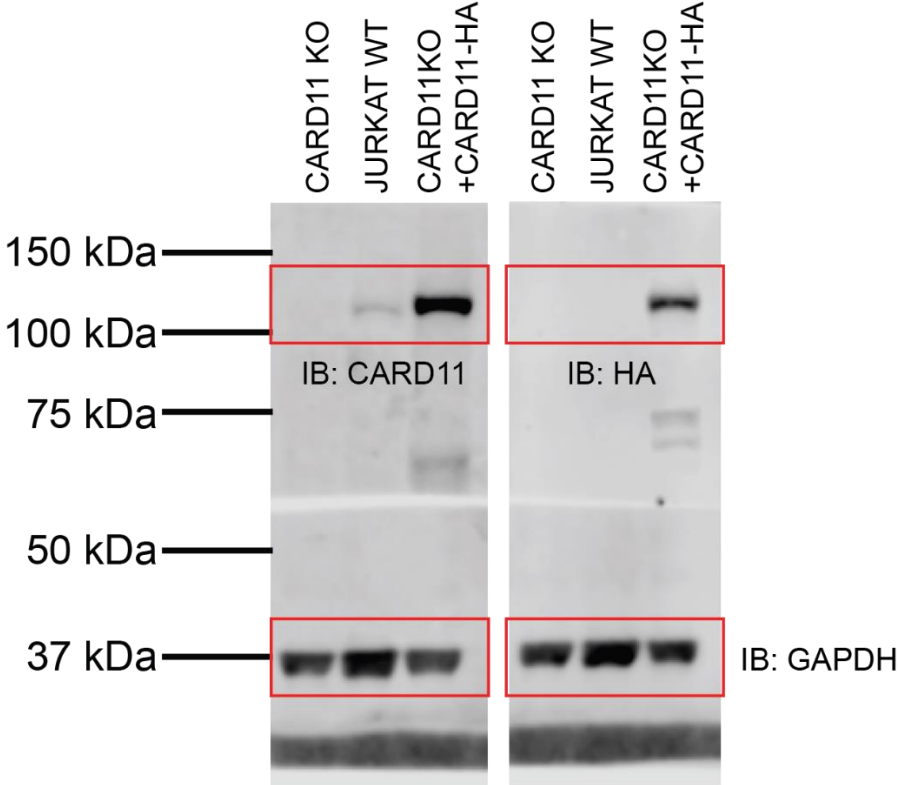

Extended Data Figure 3e (FYN-TRAF3IP2-V5, BCL10 and Actin expression in wild type and BCL10 knockout Jurkat cells infected with empty vector and FYN-TRAF3IP2-V5 lentiviruses)

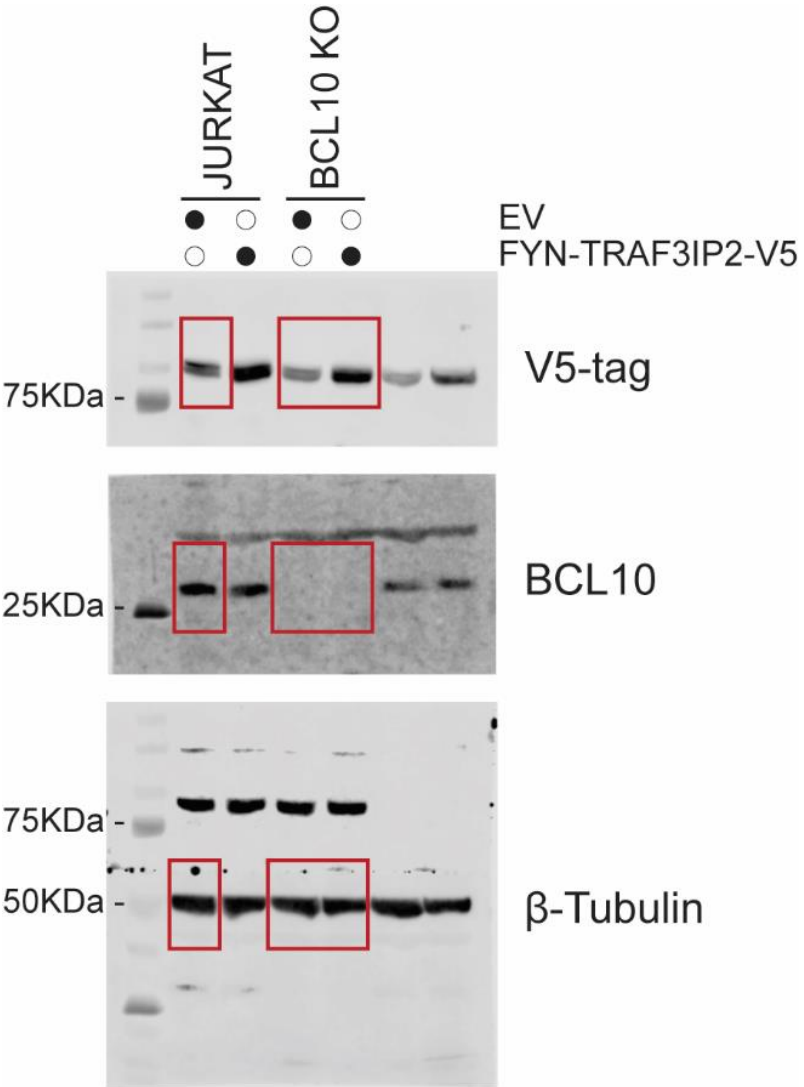

Extended Data Figure 3e (FYN-TRAF3IP2 mRNA levels analyzed by RT-PCR in Jurkat BCL10 KO cells infected with empty vector or FYN-TRAF3IP2-V5 construct)

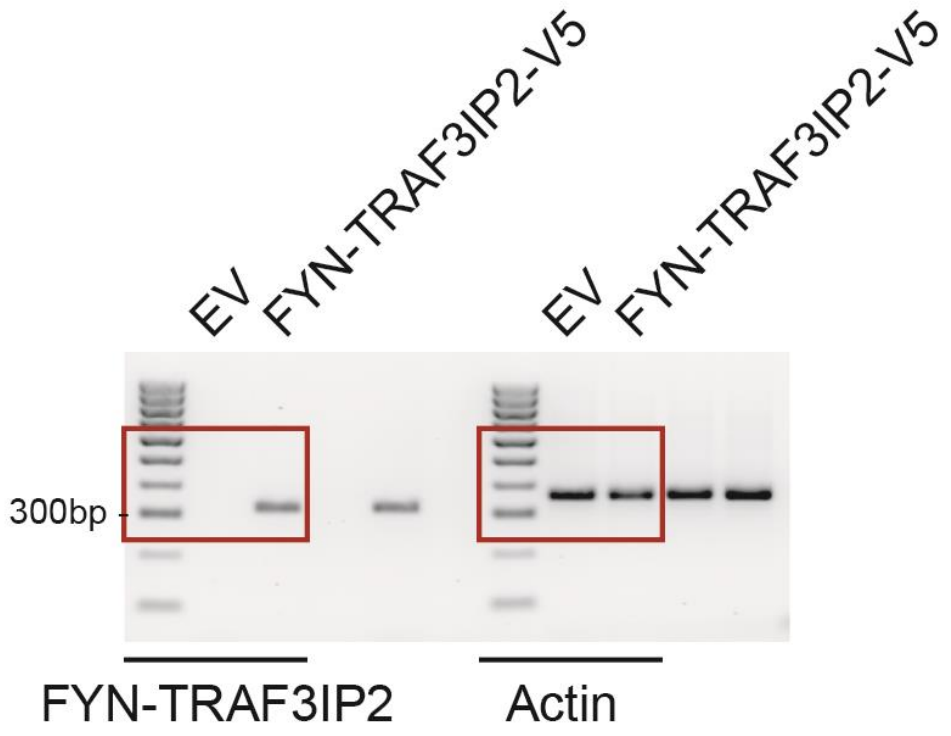

Supplement: NIHMS1677779-supplement-Source_Data_Extended_Data_Fig_3_unmodified_gels.pdf [file NIHMS1677779-supplement-Source_Data_Extended_Data_Fig_3_unmodified_gels.pdf]
