# Supplementary material
Source: PubMed Central journal article supplement (PMC8081346)

**Figure 3b (Jurkat subcellular fractionation)**

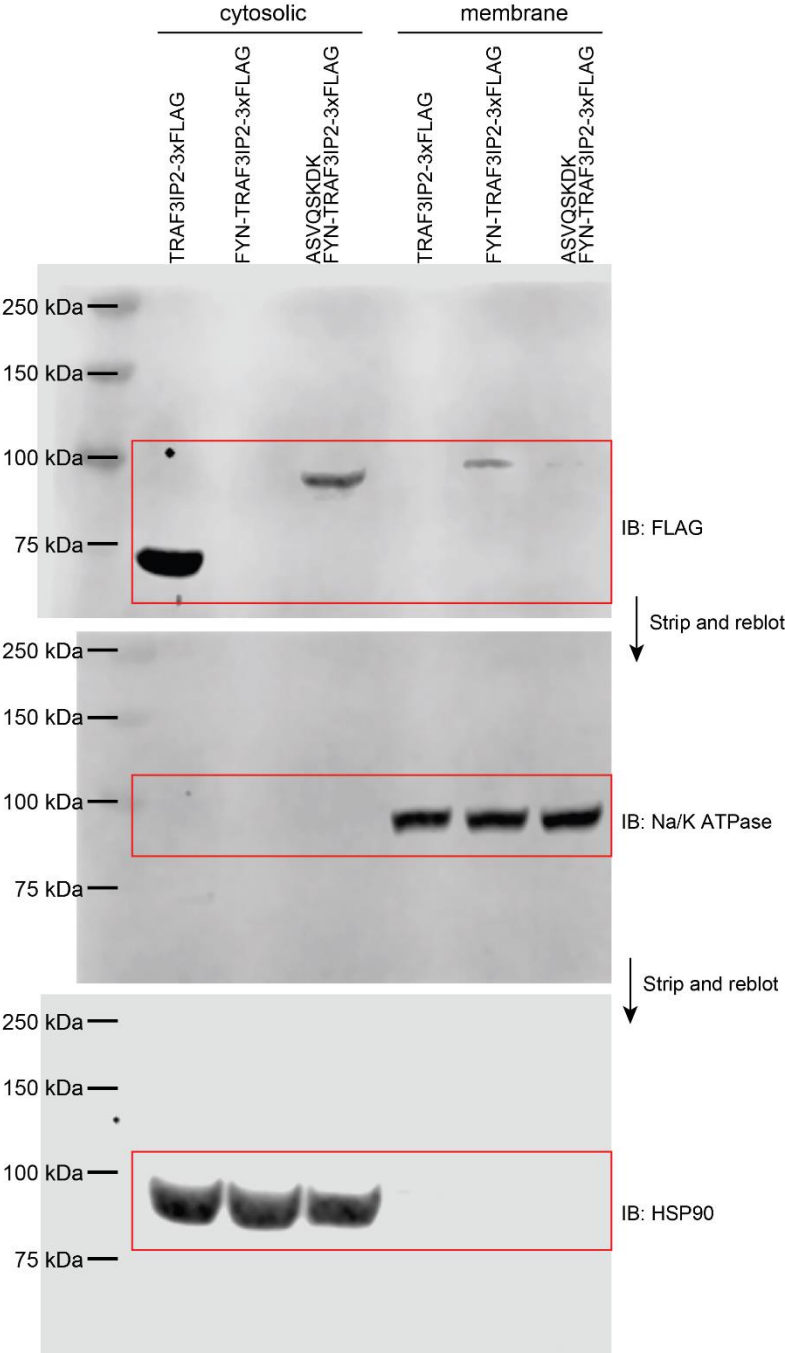

Figure 3d (293T NFkB-LUC reporter assay, membrane localization deficient mutant)

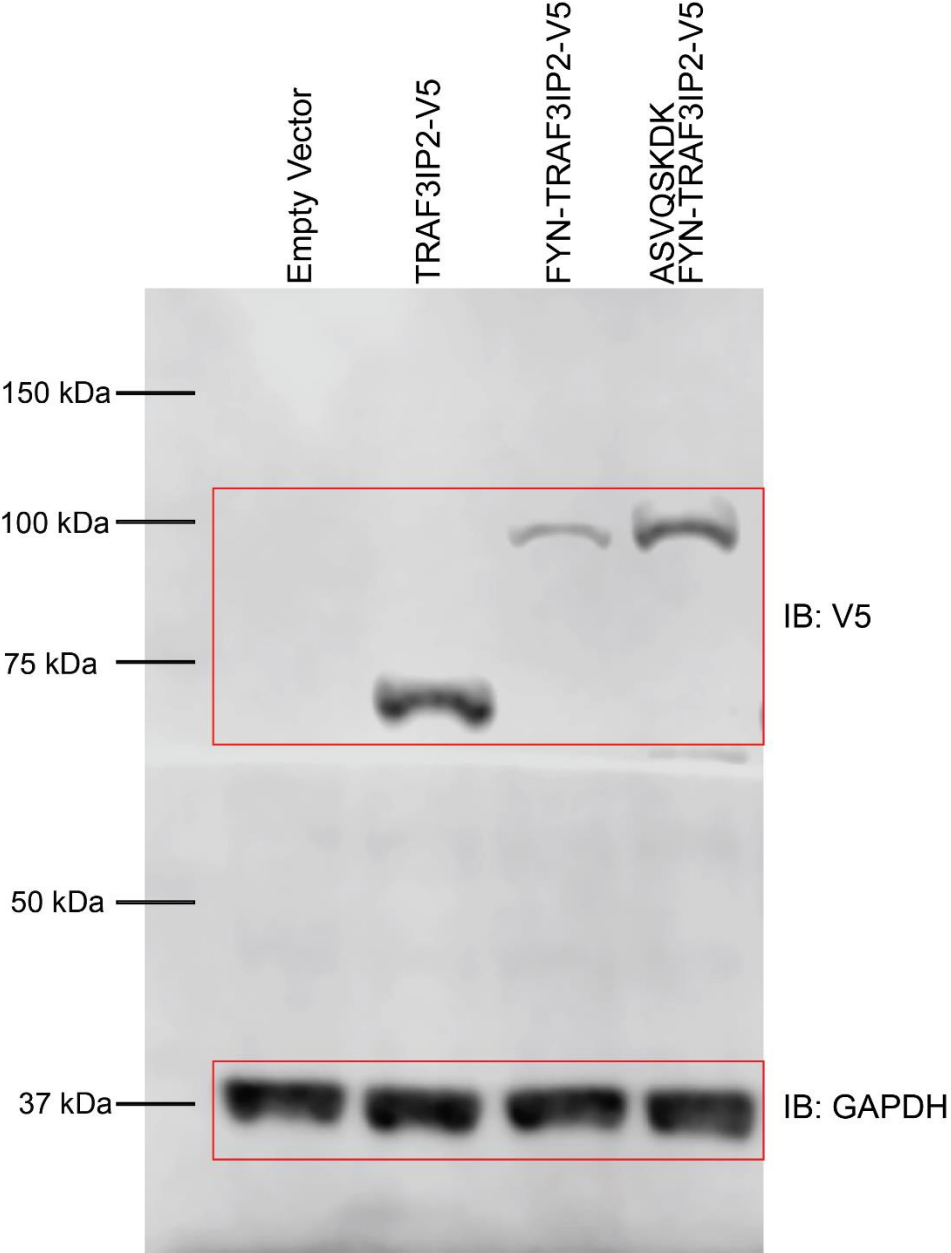

Supplement: NIHMS1677779-supplement-Source_Data_Fig_3_unmodified_gels.pdf [file NIHMS1677779-supplement-Source_Data_Fig_3_unmodified_gels.pdf]
