# Supplementary material
Source: PubMed Central journal article supplement (PMC8081346)

Figure 4a (CARD11 KO Jurkat NFkB reporter assay)

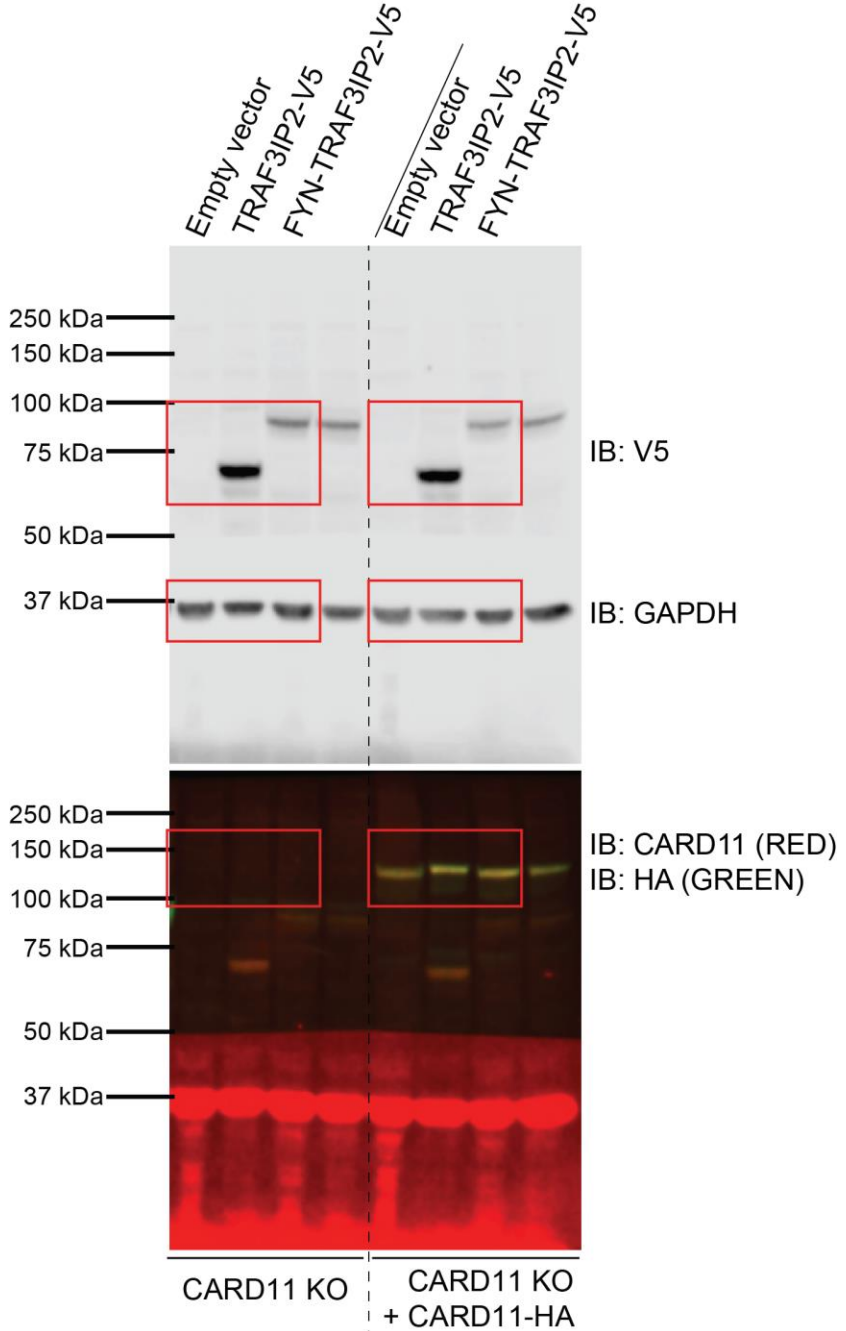

Figure 4d (NFkB p65 nuclear localization in BCL10 knockout cells)

JURKAT  
BCL10 KO

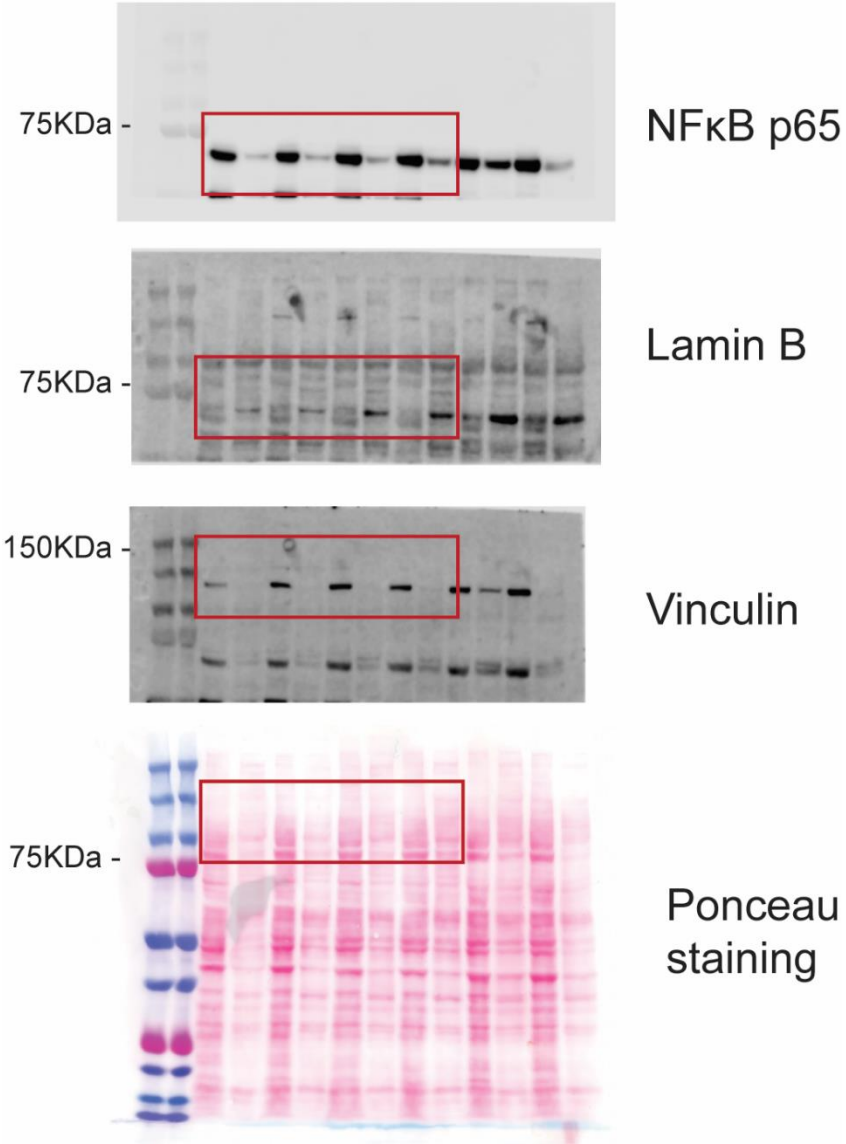

Figure 4f (293T TRAF6 IP)

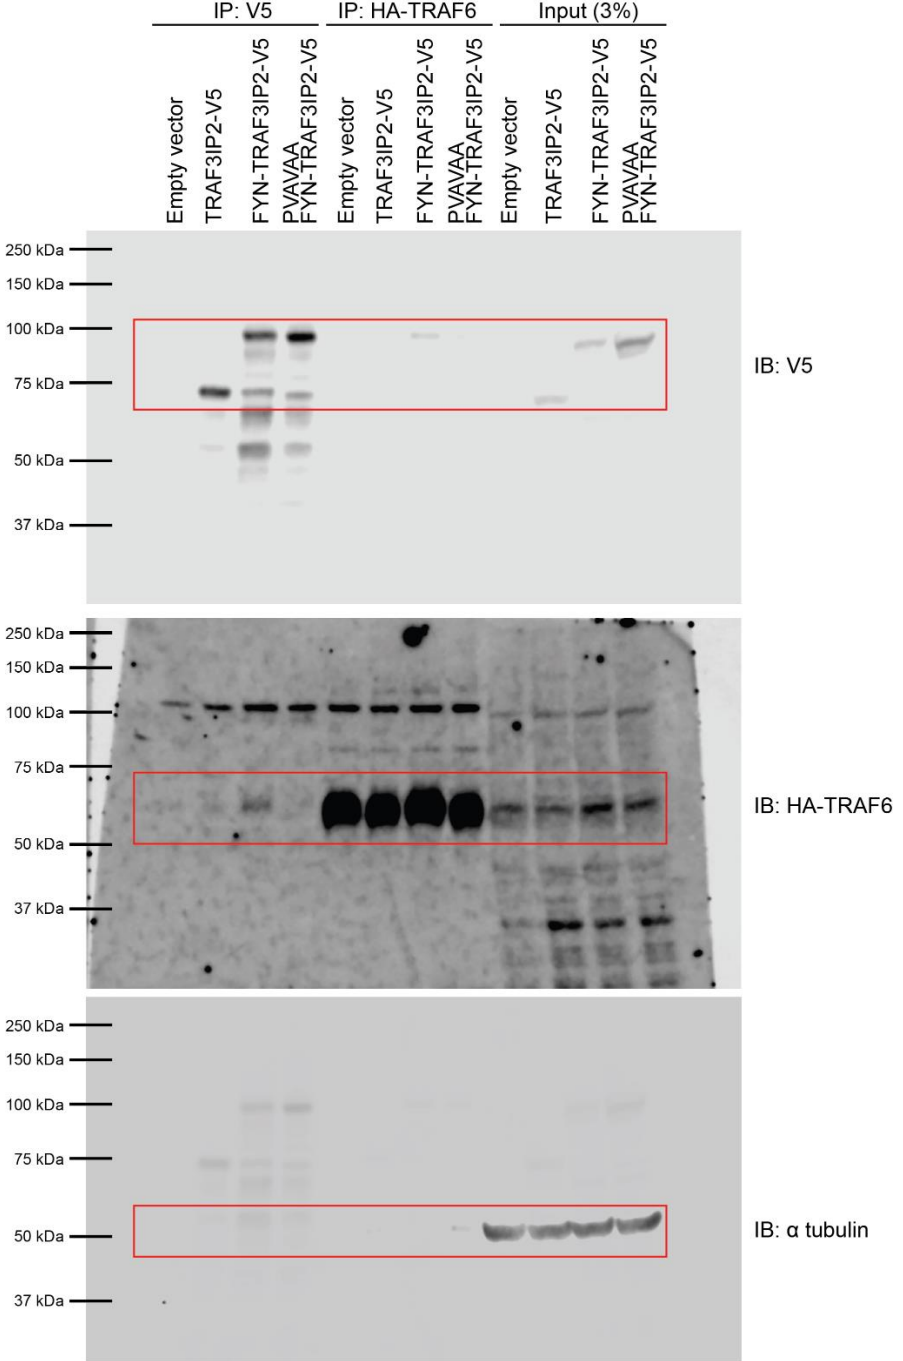

Figure 4g (Jurkat NFkB-GFP, TRAF6 binding deficient mutant)

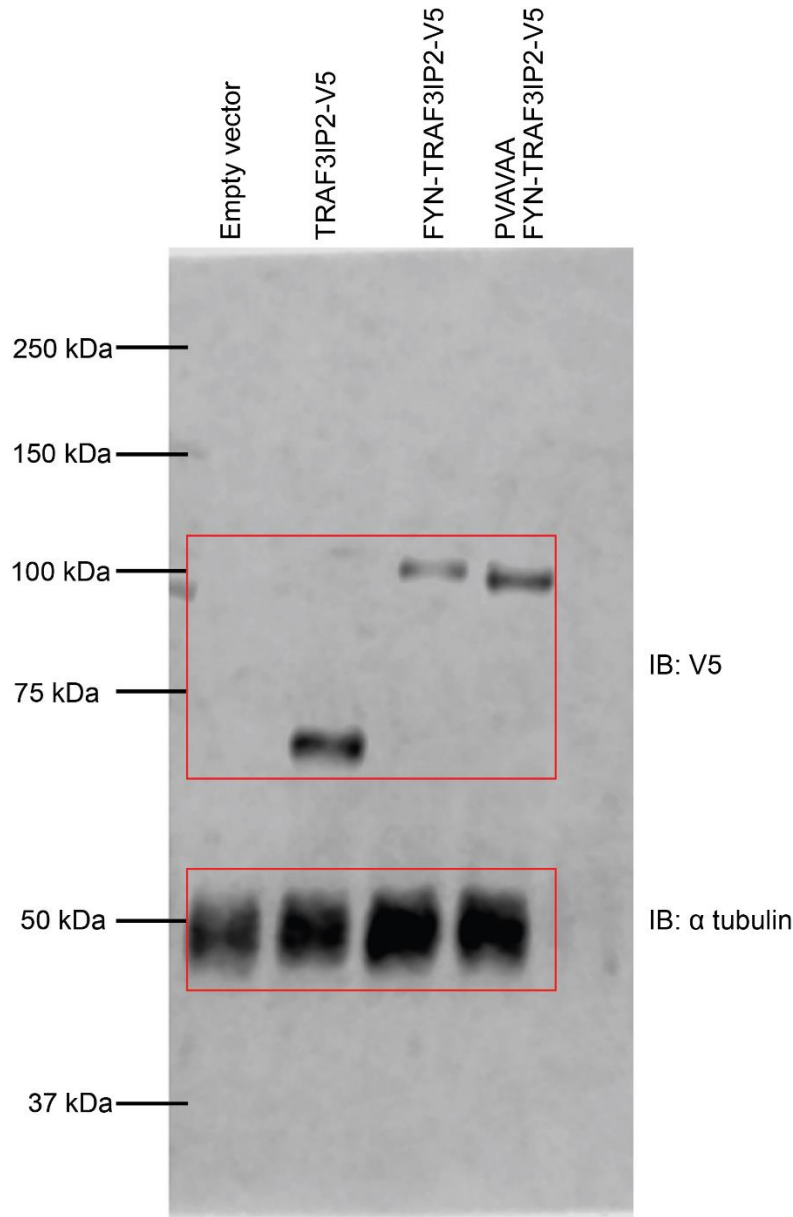

Supplement: NIHMS1677779-supplement-Source_Data_Fig_4_unmodified_gels.pdf [file NIHMS1677779-supplement-Source_Data_Fig_4_unmodified_gels.pdf]
