# Supplementary material
Source: PubMed Central journal article supplement (PMC8081346)

### Flow cytometry gating strategy

Figures 5f; 6c,d; 7c and Extended Data Figures 6d,e

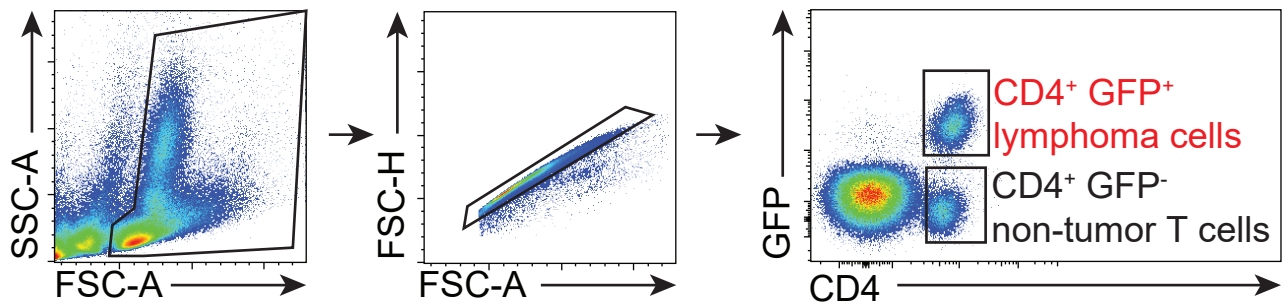

### Flow cytometry gating strategy

Extended Data Figure 7a,b

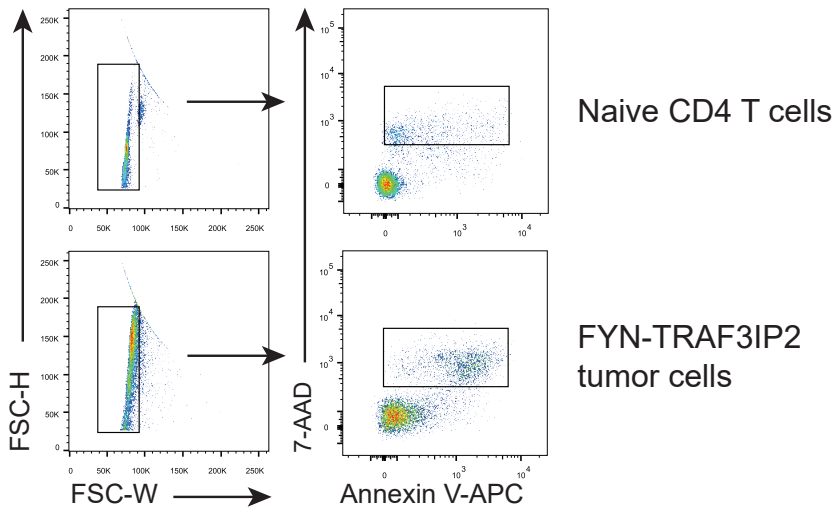

### Flow cytometry gating strategy

Extended Data Figure 7c

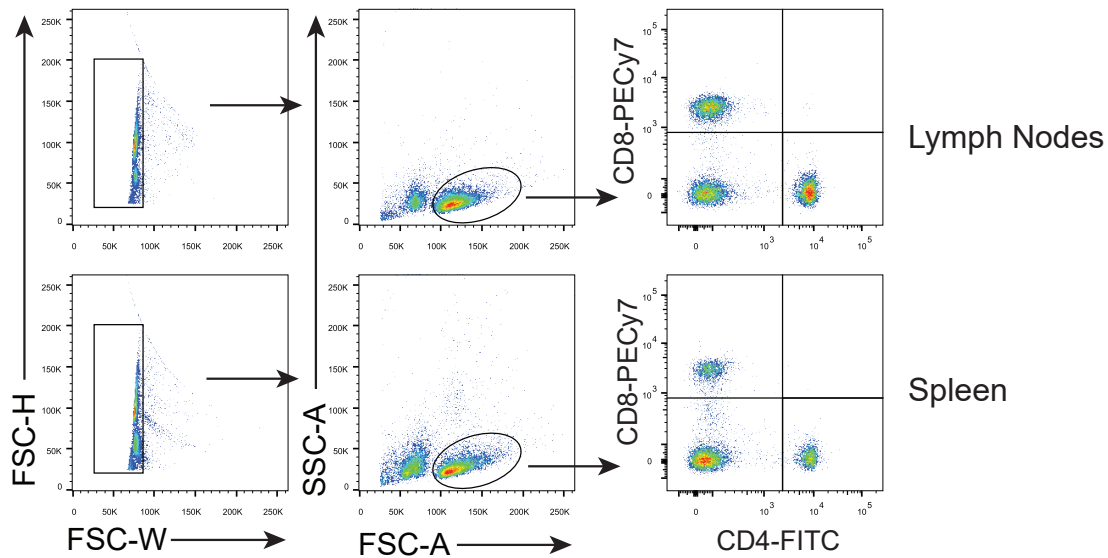

Supplement: NIHMS1677779-supplement-Supplementary_Fig_1.pdf [file NIHMS1677779-supplement-Supplementary_Fig_1.pdf]
