# Supplementary material
Source: PubMed Central journal article supplement (PMC8081346)

**Extended Data Figure 2a,b (B cell lymphoma patient sample RT-PCR)**

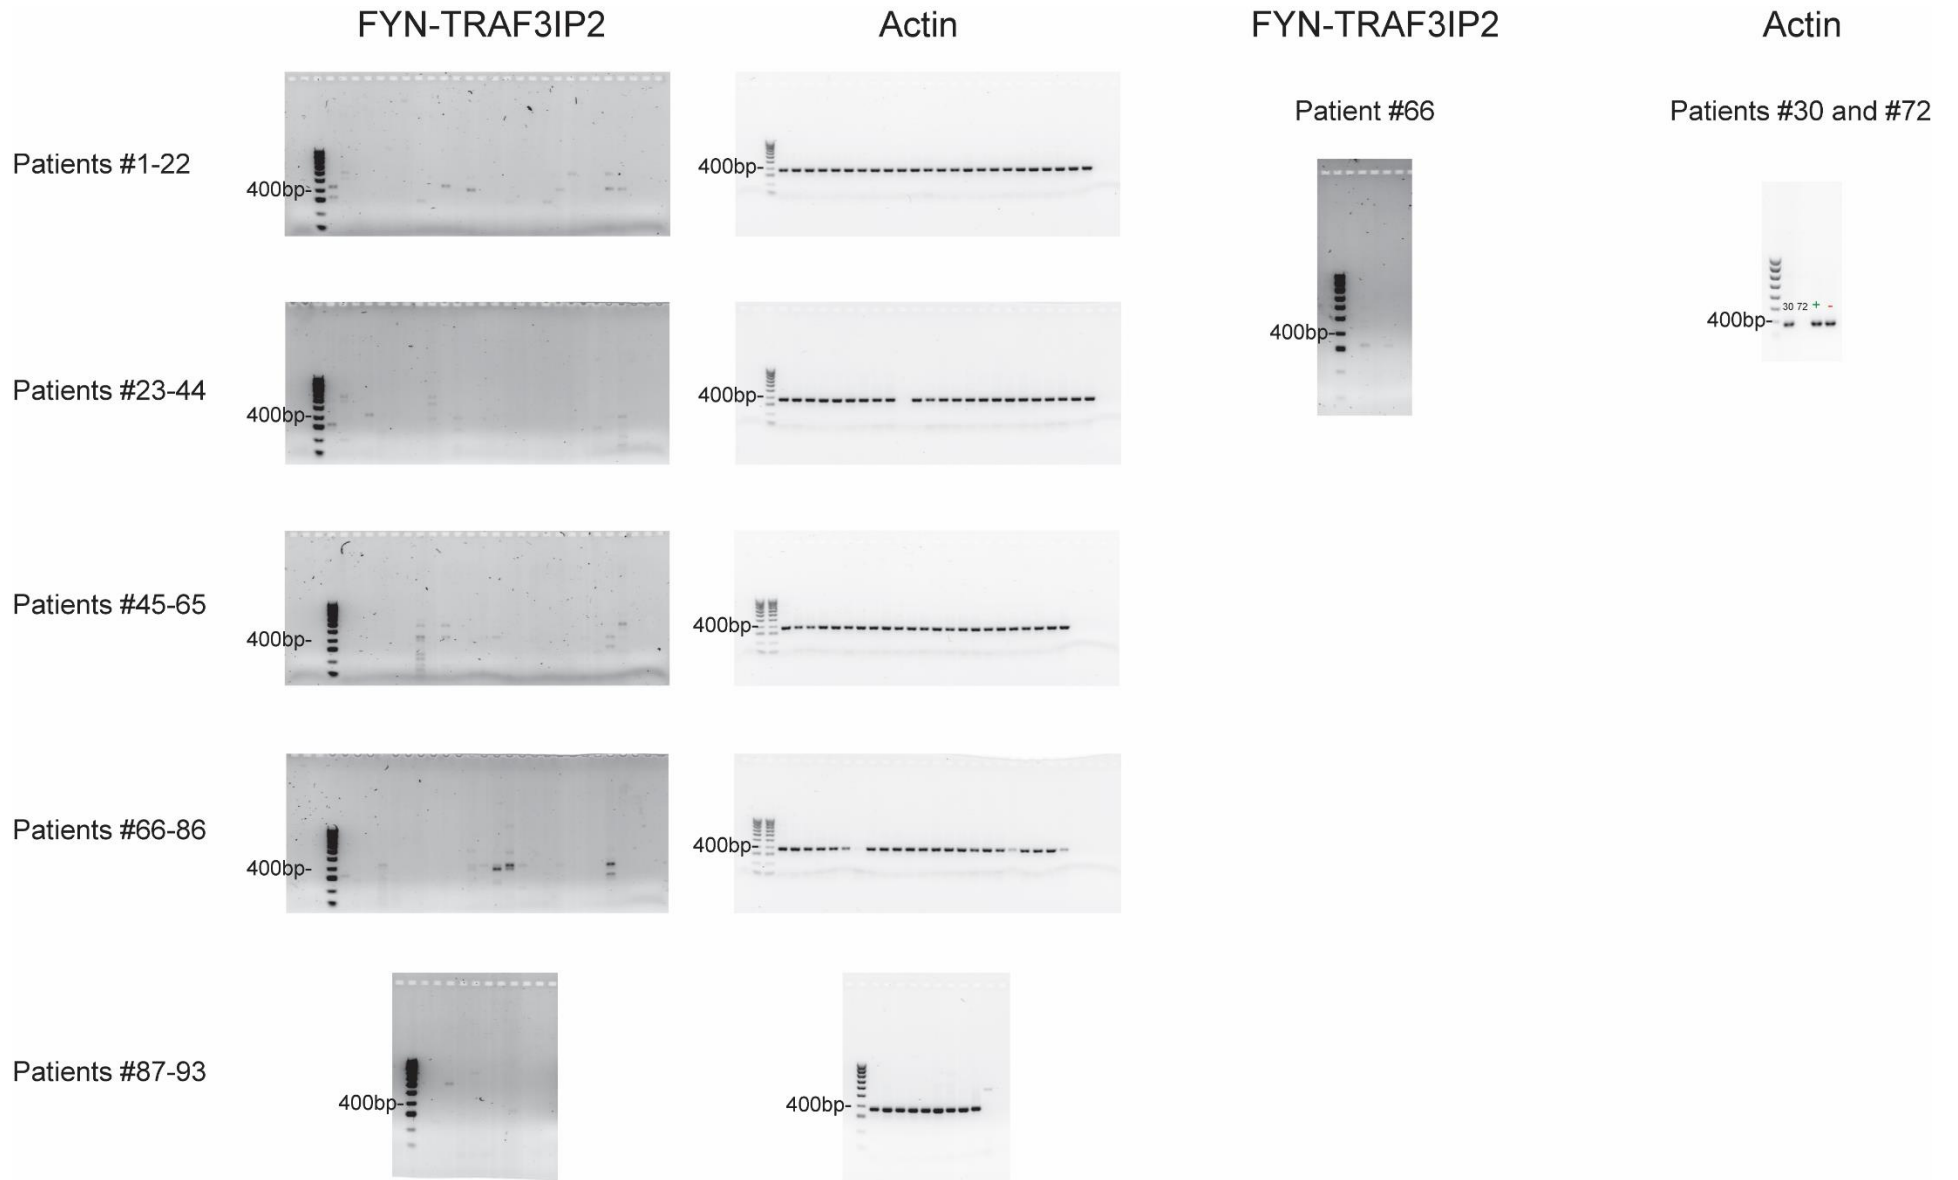

Supplement: NIHMS1677779-supplement-Source_Data_Extended_Data_Fig_2_unmodified_gels.pdf [file NIHMS1677779-supplement-Source_Data_Extended_Data_Fig_2_unmodified_gels.pdf]

Figure 2a (Jurkat NFkB-GFP experiment)

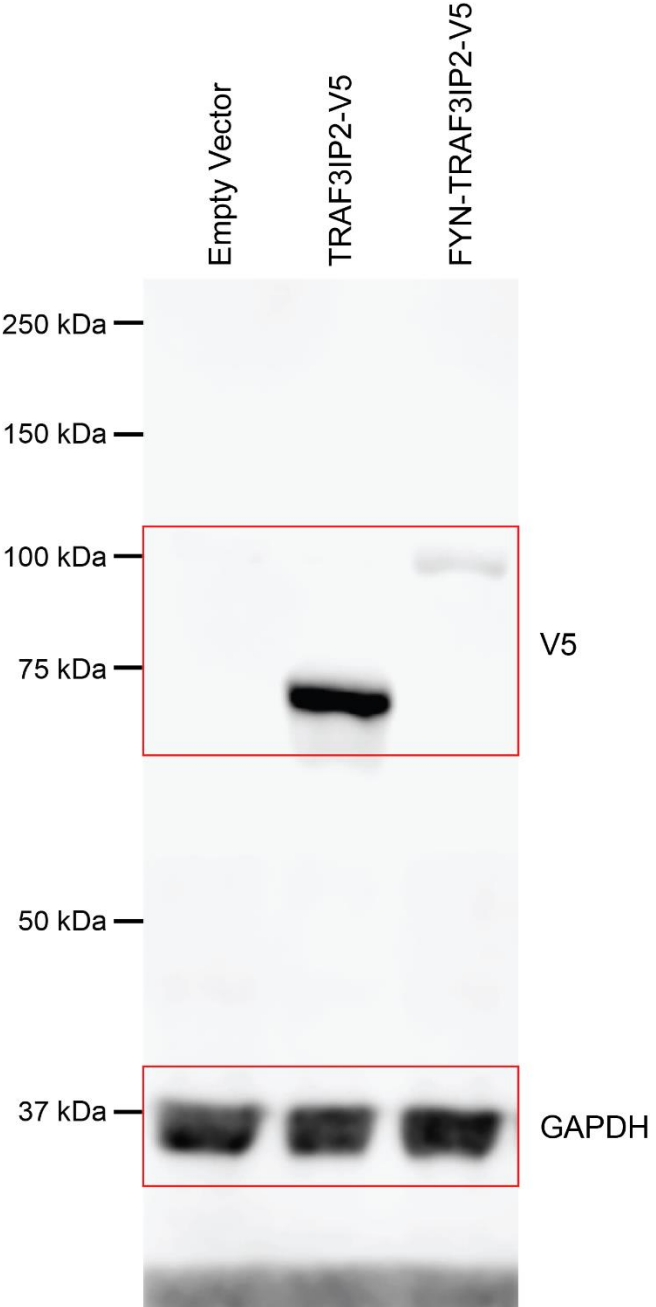

Supplement: NIHMS1677779-supplement-Source_Data_Fig_2_unmodified_gels.pdf [file NIHMS1677779-supplement-Source_Data_Fig_2_unmodified_gels.pdf]

Figure 6b (mouse PTCL, FYN-TRAF3IP2-V5 expression)

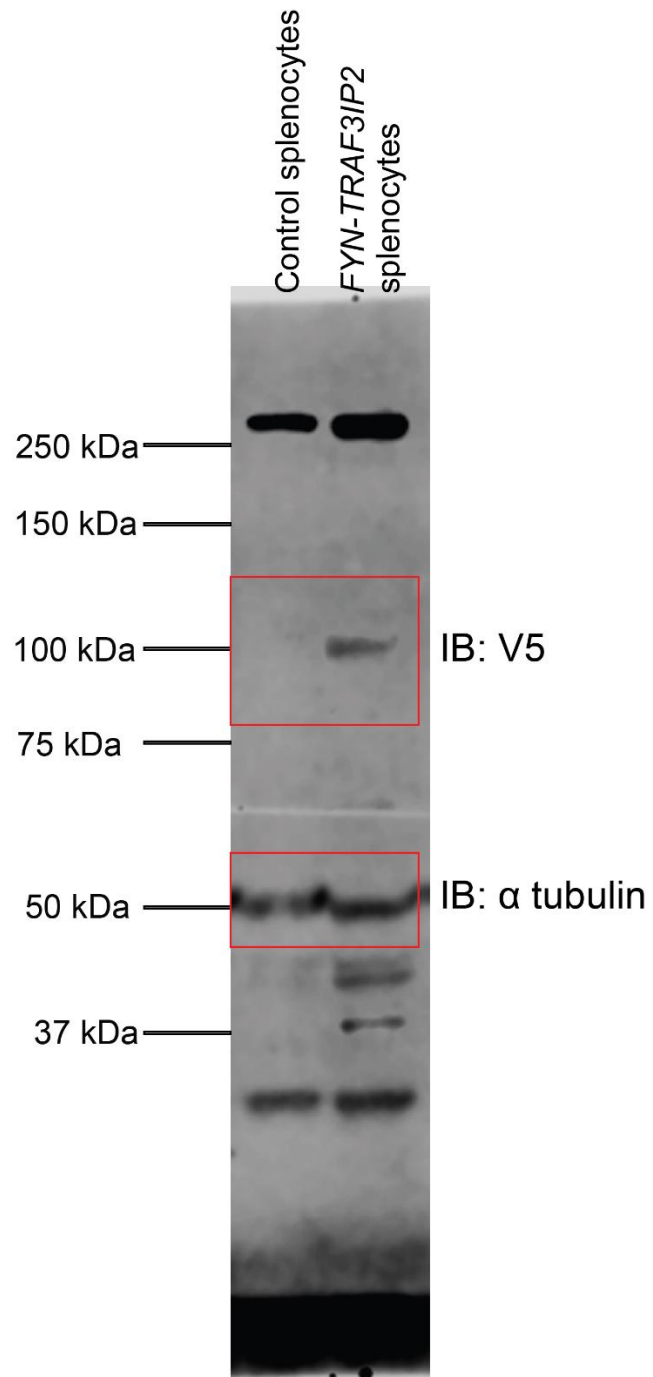

Supplement: NIHMS1677779-supplement-Source_Data_Fig_6_unmodified_gels.pdf [file NIHMS1677779-supplement-Source_Data_Fig_6_unmodified_gels.pdf]

**Figure 7d (canonical and alternative pathway activation)**

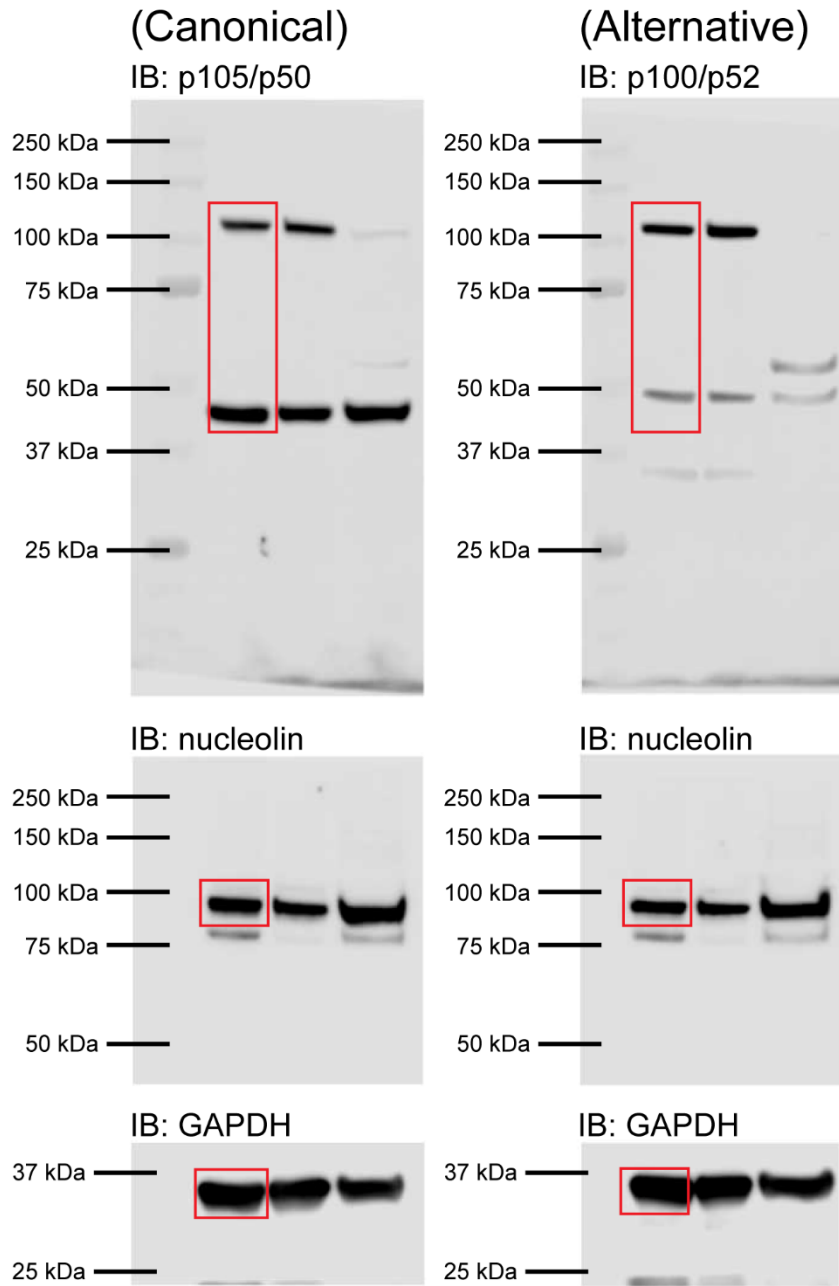

Supplement: NIHMS1677779-supplement-Source_Data_Fig_7_unmodified_gels.pdf [file NIHMS1677779-supplement-Source_Data_Fig_7_unmodified_gels.pdf]
